# Supplementary material for: Type 2 diabetes, hepatic decompensation, and hepatocellular carcinoma in patients with non-alcoholic fatty liver disease: an individual participant-level data meta-analysis
Source: PubMed Central journal article supplement (PMC10812844; doi:10.1016/s2468-1253(23)00157-7), 2023-07-04

# THE LANCET

## Gastroenterology & Hepatology

### Supplementary appendix

**This online publication has been corrected. The corrected version first appeared at [thelancet.com/gastrohep](https://www.thelancet.com/gastrohep) on July 17, 2023**

This appendix formed part of the original submission and has been peer reviewed. We post it as supplied by the authors.

Supplement to: Huang DQ, Nouredin N, Ajmera V, et al. Type 2 diabetes, hepatic decompensation, and hepatocellular carcinoma in patients with non-alcoholic fatty liver disease: an individual participant-level data meta-analysis. *Lancet Gastroenterol Hepatol* 2023; published online July 4. [https://doi.org/10.1016/S2468-1253\(23\)00157-7](https://doi.org/10.1016/S2468-1253(23)00157-7).

# **Supplementary Appendix**

## Search strategy details

Ovid MEDLINE(R) 1946 to April 24, 2023 and Epub Ahead of Print, In-Process & Other Non-Indexed Citations and Ovid MEDLINE(R) Daily, EBM Reviews - Cochrane Central Register of Controlled Trials <March 2023>, EBM Reviews - Cochrane Database of Systematic Reviews <2005 to April 24, 2023>, Embase <1974 to 2023 April 24>

|    |                                                                                                                                                                                                                                                    |        |
|----|----------------------------------------------------------------------------------------------------------------------------------------------------------------------------------------------------------------------------------------------------|--------|
| 1  | magnetic resonance elastography/ or elasticity imaging techniques/ or magnetic resonance elastography.mp. or MRE.mp.                                                                                                                               | 33790  |
| 2  | nonalcoholic fatty liver/ or Non-alcoholic Fatty Liver Disease/ or nonalcoholic fatty liver.mp. or non-alcoholic fatty liver.mp. or NAFLD.mp.                                                                                                      | 111633 |
| 3  | (stiff or stiffness).mp.                                                                                                                                                                                                                           | 257576 |
| 4  | 1 and 2 and 3                                                                                                                                                                                                                                      | 1575   |
| 5  | limit 4 to english language [Limit not valid in CDSR; records were retained]                                                                                                                                                                       | 1553   |
| 6  | limit 5 to "all adult (19 plus years)" [Limit not valid in CCTR,CDSR,Embase; records were retained]                                                                                                                                                | 1335   |
| 7  | limit 6 to (adult <18 to 64 years> or aged <65+ years>) [Limit not valid in Ovid MEDLINE(R),Ovid MEDLINE(R) Daily Update,Ovid MEDLINE(R) PubMed not MEDLINE,Ovid MEDLINE(R) In-Process,Ovid MEDLINE(R) Publisher,CCTR,CDSR; records were retained] | 913    |
| 8  | limit 7 to embase status [Limit not valid in Ovid MEDLINE(R),Ovid MEDLINE(R) Daily Update,Ovid MEDLINE(R) PubMed not MEDLINE,Ovid MEDLINE(R) In-Process,Ovid MEDLINE(R) Publisher,CCTR,CDSR; records were retained]                                | 687    |
| 9  | remove duplicates from 8                                                                                                                                                                                                                           | 566    |
| 10 | limit 9 to human [Limit not valid in CCTR,CDSR; records were retained]                                                                                                                                                                             | 566    |

## SCOPUS

|   |                                                                                                                                                                                              |    |
|---|----------------------------------------------------------------------------------------------------------------------------------------------------------------------------------------------|----|
| 1 | TITLE-ABS-KEY ( ( "magnetic AND resonance AND elastography" OR mre ) AND ( "nonalcoholic AND fatty AND liver" OR "non-alcoholic AND fatty AND liver" OR nafld ) AND ( stiff OR stiffness ) ) | 73 |
| 2 | ( LIMIT-TO ( LANGUAGE , "English" ) )                                                                                                                                                        | 73 |
| 3 | ( LIMIT-TO ( DOCTYPE , "ar" ) )                                                                                                                                                              | 60 |
| 4 | AND ( adult )                                                                                                                                                                                | 55 |

## PubMed, 272 results (limits: English language, adult, human)

(("Elasticity Imaging Techniques"[Mesh] OR Magnetic Resonance Elastography [tiab] OR MRE [tiab]) AND ("Non-alcoholic Fatty Liver Disease"[Mesh] OR Non-alcoholic Fatty Liver [tiab] nonalcoholic fatty liver [tiab] OR NAFLD [tiab]) AND (stiff [tiab] OR stiffness [tiab])) NOT letter [pt] NOT editorial [pt] NOT review [pt]

## Web of Science from 1975 to 2023 April 24 : 287 references

|   |                                                                                                                                       |            |
|---|---------------------------------------------------------------------------------------------------------------------------------------|------------|
| 1 | ALL=(magnetic resonance elastography or elasticity imaging techniques or magnetic resonance elastography or MRE)                      | 10,822     |
| 2 | ALL=(nonalcoholic fatty liver or Non-alcoholic Fatty Liver Disease or nonalcoholic fatty liver or non-alcoholic fatty liver or NAFLD) | 44,123     |
| 3 | ALL=(stiff or stiffness)                                                                                                              | 256,336    |
| 4 | #1 AND #2 AND #3                                                                                                                      | 290        |
| 5 | LA = (English)                                                                                                                        | 55,512,684 |
| 6 | #4 AND #5                                                                                                                             | 287        |

1180 total references, 418 duplicates found in EndNote

**762 total references in EndNote**

**Supplementary Table 1:** Risk of bias assessment among published studies

| Study   | Risk of bias                                                                       |                                                                                                                           |                                                                                              |                                                                                 | Applicability concerns                                                          |            |                    |
|---------|------------------------------------------------------------------------------------|---------------------------------------------------------------------------------------------------------------------------|----------------------------------------------------------------------------------------------|---------------------------------------------------------------------------------|---------------------------------------------------------------------------------|------------|--------------------|
|         | Patient Selection                                                                  | Index test                                                                                                                | Reference standard                                                                           | Flow and timing                                                                 | Patient selection                                                               | Index test | Reference standard |
| Matsui  | Low                                                                                | High (MRE threshold was not prespecified)                                                                                 | Unclear                                                                                      | Low                                                                             | Low                                                                             | Low        | Low                |
| Han     | High (Patients with weight gain more than 5% within 6 months of MRE were excluded) | High (MRE threshold was not prespecified)                                                                                 | Low                                                                                          | Low                                                                             | High (We do not have this exclusion criteria in our systematic review question) | Low        | Low                |
| Gidener | Low                                                                                | Low                                                                                                                       | Unclear (it was not reported whether the outcomes assessment was blinded to the MRE results) | High (patients with less than 30 days of follow up were excluded from analysis) | Low                                                                             | Low        | Low                |
| Tamaki  | High (patients with follow up less than six months were excluded)                  | Unclear (it was unclear if the index test results were interpreted without knowledge of the results of the standard test) | Unclear                                                                                      | Unclear                                                                         | Low                                                                             | Low        | Unclear            |
| Ajmera  | Low                                                                                | Low                                                                                                                       | Unclear (it was not reported whether the outcomes assessment was blinded to the MRE results) | Low                                                                             | Low                                                                             | Low        | Low                |

Abbreviations: MRE, magnetic resonance elastography

**Supplemental Table 2.** Factors associated with hepatic decompensation (ascites, hepatic encephalopathy, or variceal bleeding) at baseline

|                                         | <b>Univariable OR</b> | <b>P-value</b> | <b>Multivariable OR</b> | <b>P-value</b> |
|-----------------------------------------|-----------------------|----------------|-------------------------|----------------|
| Age (years)                             | 1.02 (1.01-1.04)      | 0.0035         | 1.01 (0.99-1.03)        | 0.1136         |
| BMI (kg/m <sup>2</sup> )                | 1.03 (1.00-1.05)      | 0.0279         | 1.00 (0.97-1.03)        | 0.9865         |
| Race/ethnicity (White versus non-White) | 3.73 (2.62-6.16)      | <.0001         | 4.65 (2.65-8.15)        | <.0001         |
| Presence of T2DM (versus no T2DM)       | 2.95 (2.00-4.36)      | <.0001         | 3.08 (1.98-4.78)        | <.0001         |

Abbreviations: OR, odds ratio; BMI, body mass index; T2DM, type 2 diabetes mellitus

**Supplemental Table 3.** HbA1c as a predictor of incident hepatic decompensation (ascites, hepatic encephalopathy, or variceal bleeding), accounting for death without hepatic decompensation as a competing risk

|                                         | <b>Univariable sHR</b> | <b>P-value</b> | <b>Multivariable sHR</b> | <b>P-value</b> |
|-----------------------------------------|------------------------|----------------|--------------------------|----------------|
| Age (years)                             | 1.05 (1.03-1.06)       | <0.0001        | 1.06 (1.03-1.08)         | <0.0001        |
| BMI (kg/m <sup>2</sup> )                | 1.03 (1.00-1.05)       | 0.027          | 1.02 (0.98-1.06)         | 0.42           |
| Race/ethnicity (White versus non-White) | 1.64 (1.05-2.56)       | 0.029          | 1.50 (0.79-2.85)         | 0.22           |
| HbA1c (per 1-unit increase)             | 1.30 (1.13-1.49)       | 0.0002         | 1.31 (1.10-1.55)         | 0.0019         |

Abbreviations: sHR, subdistribution hazard ratio; BMI, body mass index; HbA1c, hemoglobin A1c

**Supplemental Table 4.** Factors associated with incident development of HCC, with death without HCC as a competing risk

|                                         | <b>Univariable sHR</b> | <b>P-value</b> | <b>Multivariable sHR</b> | <b>P-value</b> |
|-----------------------------------------|------------------------|----------------|--------------------------|----------------|
| Age (years)                             | 1.07 (1.03-1.11)       | 0.0006         | 1.07 (1.002-1.12)        | 0.0052         |
| BMI (kg/m <sup>2</sup> )                | 0.96 (0.90-1.03)       | 0.27           | 0.95 (0.87-1.04)         | 0.30           |
| Race/ethnicity (White versus non-White) | 0.44 (0.19-1.05)       | 0.064          | 0.36 (0.12-1.06)         | 0.065          |
| HbA1c (per 1-unit increase)             | 1.21 (1.01-1.44)       | 0.039          | 1.32 (1.02-1.71)         | 0.034          |

Abbreviations: HCC, hepatocellular carcinoma; sHR, subdistribution hazard ratio; BMI, body mass index; T2DM, type 2 diabetes mellitus



**Supplemental Table 5.** Predictors of incident hepatic decompensation (ascites, hepatic encephalopathy, or variceal bleeding), accounting for death without hepatic decompensation as a competing risk, adjusted for liver stiffness by MRE

|                                   | <b>Univariable sHR</b> | <b>P-value</b> | <b>Multivariable sHR</b> | <b>P-value</b> |
|-----------------------------------|------------------------|----------------|--------------------------|----------------|
| Liver stiffness by MRE (kPA)      | 1.39 (1.29-1.49)       | <.0001         | 1.35 (1.25-1.45)         | <.0001         |
| Presence of T2DM (versus no T2DM) | 3.29 (2.21-4.90)       | <.0001         | 1.90 (1.21-2.96)         | 0.0050         |

Abbreviations: MRE, magnetic resonance elastography; sHR, subdistribution hazard ratio; T2DM, type 2 diabetes mellitus

**Supplemental Table 6.** Predictors of incident HCC, accounting for death without HCC as a competing risk, adjusted for liver stiffness by MRE

|                                   | <b>Univariable sHR</b> | <b>P-value</b> | <b>Multivariable sHR</b> | <b>P-value</b> |
|-----------------------------------|------------------------|----------------|--------------------------|----------------|
| Liver stiffness by MRE (kPA)      | 1.36 (1.26-1.47)       | <.0001         | 1.28 (1.17-1.39)         | <.0001         |
| Presence of T2DM (versus no T2DM) | 7.72 (2.61-22.87)      | 0.0002         | 5.50 (1.63-15.67)        | 0.005          |

Abbreviations: HCC, hepatocellular carcinoma; MRE, magnetic resonance elastography; sHR, subdistribution hazard ratio; T2DM, type 2 diabetes mellitus

**Supplemental Table 7.** Predictors of incident hepatic decompensation (ascites, hepatic encephalopathy, or variceal bleeding), accounting for death without hepatic decompensation as a competing risk, among participants without cirrhosis (MRE < 5.0 kPa)

|                                         | <b>Univariable SHR</b> | <b>P-value</b> | <b>Multivariable sHR</b> | <b>P-value</b> |
|-----------------------------------------|------------------------|----------------|--------------------------|----------------|
| Age (years)                             | 1.07 (1.04-1.10)       | <.0001         | 1.06 (1.03-1.09)         | 0.0002         |
| BMI (kg/m <sup>2</sup> )                | 0.99 (0.94-1.04)       | 0.65           | 0.98 (0.92-1.05)         | 0.58           |
| Race/ethnicity (White versus non-White) | 1.54 (0.60-3.97)       | 0.37           | 2.75 (0.99-7.60)         | 0.052          |
| Presence of T2DM (versus no T2DM)       | 3.56 (1.61-7.88)       | 0.0017         | 2.48 (1.10-5.61)         | 0.029          |

Abbreviations: MRE, magnetic resonance elastography; sHR, subdistribution hazard ratio; BMI, body mass index; T2DM, type 2 diabetes mellitus

**Supplemental Table 8.** Predictors of incident hepatic decompensation (ascites, hepatic encephalopathy, or variceal bleeding), accounting for death without hepatic decompensation as a competing risk, among participants with cirrhosis (MRE  $\geq$  5.0 kPa)

|                                         | <b>Univariable sHR</b> | <b>P-value</b> | <b>Multivariable sHR</b> | <b>P-value</b> |
|-----------------------------------------|------------------------|----------------|--------------------------|----------------|
| Age (years)                             | 1.02 (1.00-1.03)       | 0.0312         | 1.03 (1.01-1.05)         | 0.0038         |
| BMI (kg/m <sup>2</sup> )                | 1.05 (1.03-1.08)       | <.0001         | 1.04 (1.00-1.07)         | 0.033          |
| Race/ethnicity (White versus non-White) | 2.57 (1.56-4.26)       | 0.0002         | 2.30 (1.26-4.22)         | 0.0070         |
| Presence of T2DM (versus no T2DM)       | 1.43 (0.90-2.27)       | 0.13           | 1.00 (0.62-1.62)         | 0.99           |

Abbreviations: MRE, magnetic resonance elastography; sHR, subdistribution hazard ratio; BMI, body mass index; T2DM, type 2 diabetes mellitus

**Supplemental Table 9.** Predictors of incident hepatocellular carcinoma, accounting for death without hepatic decompensation as a competing risk, among participants with cirrhosis (MRE  $\geq$  5.0 kPa)

|                                         | <b>Univariable SHR</b> | <b>P-value</b> | <b>Multivariable sHR</b> | <b>P-value</b> |
|-----------------------------------------|------------------------|----------------|--------------------------|----------------|
| Age (years)                             | 1.05 (1.01-1.10)       | 0.015          | 1.04 (0.99-1.09)         | 0.10           |
| BMI (kg/m <sup>2</sup> )                | 0.96 (0.90-1.04)       | 0.33           | 0.97 (0.88-1.07)         | 0.56           |
| Race/ethnicity (White versus non-White) | 0.47 (0.18-1.21)       | 0.12           | 0.71 (0.24-2.11)         | 0.53           |
| Presence of T2DM (versus no T2DM)       | 6.12 (1.43-26.23)      | 0.015          | 5.25 (1.12-24.67)        | 0.036          |

Abbreviations: MRE, magnetic resonance elastography; sHR, subdistribution hazard ratio; BMI, body mass index; T2DM, type 2 diabetes mellitus

**Supplemental Table 10.** Predictors of incident HCC, accounting for death without hepatic decompensation as a competing risk and adjusted for a minimally sufficient set of confounders, among participants without cirrhosis (MRE < 5.0 kPa)

|                                         | <b>Univariable SHR</b> | <b>P-value</b> | <b>Multivariable sHR</b> | <b>P-value</b> |
|-----------------------------------------|------------------------|----------------|--------------------------|----------------|
| Age (years)                             | 1.03 (0.94-1.14)       | 0.41           | 1.03 (0.93-1.14)         | 0.59           |
| BMI (kg/m <sup>2</sup> )                | 0.97 (0.90-1.05)       | 0.46           | 0.97 (0.83-1.13)         | 0.71           |
| Race/ethnicity (White versus non-White) | 1.06 (0.09-12.48)      | 0.96           | 1.46 (0.05-40.49)        | 0.82           |
| Presence of T2DM (versus no T2DM)       | 1.24 (0.12-13.00)      | 0.86           | 1.12 (0.07-18.89)        | 0.94           |

Abbreviations: HCC, hepatocellular carcinoma; MRE, magnetic resonance elastography; sHR, subdistribution hazard ratio; BMI, body mass index; T2DM, type 2 diabetes mellitus

**Supplemental Table 11.** HbA1c as a predictor of incident hepatic decompensation (ascites, hepatic encephalopathy, or variceal bleeding), accounting for death without hepatic decompensation as a competing risk, among participants with T2DM

|                                         | <b>Univariable sHR</b> | <b>P-value</b> | <b>Multivariable sHR</b> | <b>P-value</b> |
|-----------------------------------------|------------------------|----------------|--------------------------|----------------|
| Age (years)                             | 1.02 (1.00-1.04)       | 0.030          | 1.04 (1.01-1.07)         | 0.0084         |
| BMI (kg/m <sup>2</sup> )                | 1.04 (1.00-1.07)       | 0.029          | 1.03 (0.99-1.08)         | 0.19           |
| Race/ethnicity (White versus non-White) | 1.90 (1.12-3.23)       | 0.017          | 1.21 (0.59-2.52)         | 0.60           |
| HbA1c (per 1-unit increase)             | 1.18 (0.98-1.42)       | 0.080          | 1.21 (0.99-1.49)         | 0.066          |

Abbreviations: T2DM, type 2 diabetes mellitus; sHR, subdistribution hazard ratio; BMI, body mass index; HbA1c, hemoglobin A1c

**Supplemental Table 12.** HbA1c as a predictor of incident hepatic decompensation (ascites, hepatic encephalopathy, or variceal bleeding), accounting for death without hepatic decompensation as a competing risk, among participants without T2DM

|                                         | <b>Univariable sHR</b> | <b>P-value</b> | <b>Multivariable sHR</b> | <b>P-value</b> |
|-----------------------------------------|------------------------|----------------|--------------------------|----------------|
| Age (years)                             | 1.06 (1.04-1.09)       | <0.0001        | 1.08 (1.03-1.13)         | 0.0009         |
| BMI (kg/m <sup>2</sup> )                | 1.00 (0.97-1.04)       | 0.84           | 0.91 (0.81-1.02)         | 0.092          |
| Race/ethnicity (White versus non-White) | 2.07 (0.90-4.76)       | 0.088          | 4.22 (0.97-18.36)        | 0.055          |
| HbA1c (per 1-unit increase)             | 1.16 (0.69-1.93)       | 0.58           | 1.40 (0.85-2.30)         | 0.19           |

Abbreviations: HbA1c, hemoglobin A1c; T2DM, type 2 diabetes mellitus; sHR, subdistribution hazard ratio; BMI, body mass index



**Supplemental Table 13.** Predictors of incident hepatic decompensation (ascites, hepatic encephalopathy, or variceal bleeding), accounting for death without hepatic decompensation as a competing risk, with sex in the model

|                                         | <b>Univariable sHR</b> | <b>P-value</b> | <b>Multivariable sHR</b> | <b>P-value</b> |
|-----------------------------------------|------------------------|----------------|--------------------------|----------------|
| Age (years)                             | 1.05 (1.03-1.06)       | <0.0001        | 1.05 (1.03-1.07)         | <0.0001        |
| Female sex                              | 1.72 (1.16-2.57)       | 0.0075         | 1.36 (0.89-2.07)         | 0.16           |
| BMI (kg/m <sup>2</sup> )                | 1.03 (1.00-1.05)       | 0.027          | 1.02 (0.99-1.05)         | 0.10           |
| Race/ethnicity (White versus non-White) | 1.64 (1.05-2.56)       | 0.029          | 1.84 (1.10-3.07)         | 0.020          |
| Presence of T2DM (versus no T2DM)       | 3.29 (2.21-4.90)       | <0.0001        | 2.16 (1.39-3.34)         | 0.0006         |

Abbreviations: sHR, subdistribution hazard ratio; BMI, body mass index; T2DM, type 2 diabetes mellitus

**Supplemental Table 14.** HbA1c as a predictor of incident hepatic decompensation (ascites, hepatic encephalopathy, or variceal bleeding), accounting for death without hepatic decompensation as a competing risk, with sex in the model

|                                         | <b>Univariable sHR</b> | <b>P-value</b> | <b>Multivariable sHR</b> | <b>P-value</b> |
|-----------------------------------------|------------------------|----------------|--------------------------|----------------|
| Age (years)                             | 1.05 (1.03-1.06)       | <0.0001        | 1.06 (1.03-1.08)         | <0.0001        |
| Female sex                              | 1.72 (1.16-2.57)       | 0.0075         | 1.28 (0.74-2.21)         | 0.38           |
| BMI (kg/m <sup>2</sup> )                | 1.03 (1.00-1.05)       | 0.027          | 1.02 (0.97-1.06)         | 0.50           |
| Race/ethnicity (White versus non-White) | 1.64 (1.05-2.56)       | 0.029          | 1.50 (0.79-2.85)         | 0.22           |
| HbA1c (per 1-unit increase)             | 1.30 (1.13-1.49)       | 0.0002         | 1.31 (1.10-1.55)         | 0.0019         |

Abbreviations: HbA1c, hemoglobin A1c; sHR, subdistribution hazard ratio; BMI, body mass index; T2DM, type 2 diabetes mellitus

**Supplemental Table 15.** Predictors of incident HCC, accounting for death without HCC as a competing risk, with sex in the model

|                                         | <b>Univariable sHR</b> | <b>P-value</b> | <b>Multivariable sHR</b> | <b>P-value</b> |
|-----------------------------------------|------------------------|----------------|--------------------------|----------------|
| Age (years)                             | 1.07 (1.03-1.11)       | 0.0006         | 1.05 (1.01-1.10)         | 0.018          |
| Female sex                              | 0.50 (0.21-1.20)       | 0.12           | 0.41 (0.16-1.02)         | 0.055          |
| BMI (kg/m <sup>2</sup> )                | 0.96 (0.90-1.03)       | 0.27           | 1.00 (0.91-1.09)         | 0.94           |
| Race/ethnicity (White versus non-White) | 0.44 (0.19-1.05)       | 0.06           | 0.65 (0.22-1.91)         | 0.44           |
| Presence of T2DM (versus no T2DM)       | 7.72 (2.61-22.87)      | 0.0002         | 5.27 (1.65-16.82)        | 0.0049         |

Abbreviations: HCC, hepatocellular carcinoma; sHR, subdistribution hazard ratio; BMI, body mass index; T2DM, type 2 diabetes mellitus

**Supplemental Figure 1.** Directed acyclic graph summarizing the associations between T2DM, covariates, and the primary outcome of hepatic decompensation. Beige circles represent ancestors of the exposure and outcome, the green circle represents the causal determinant of interest. Dark blue represents the causal path, while black represents potential biasing paths. The final minimally sufficient set of confounders included age, race/ethnicity, and body mass index.

Abbreviations: T2DM, type 2 diabetes mellitus; BMI, body mass index

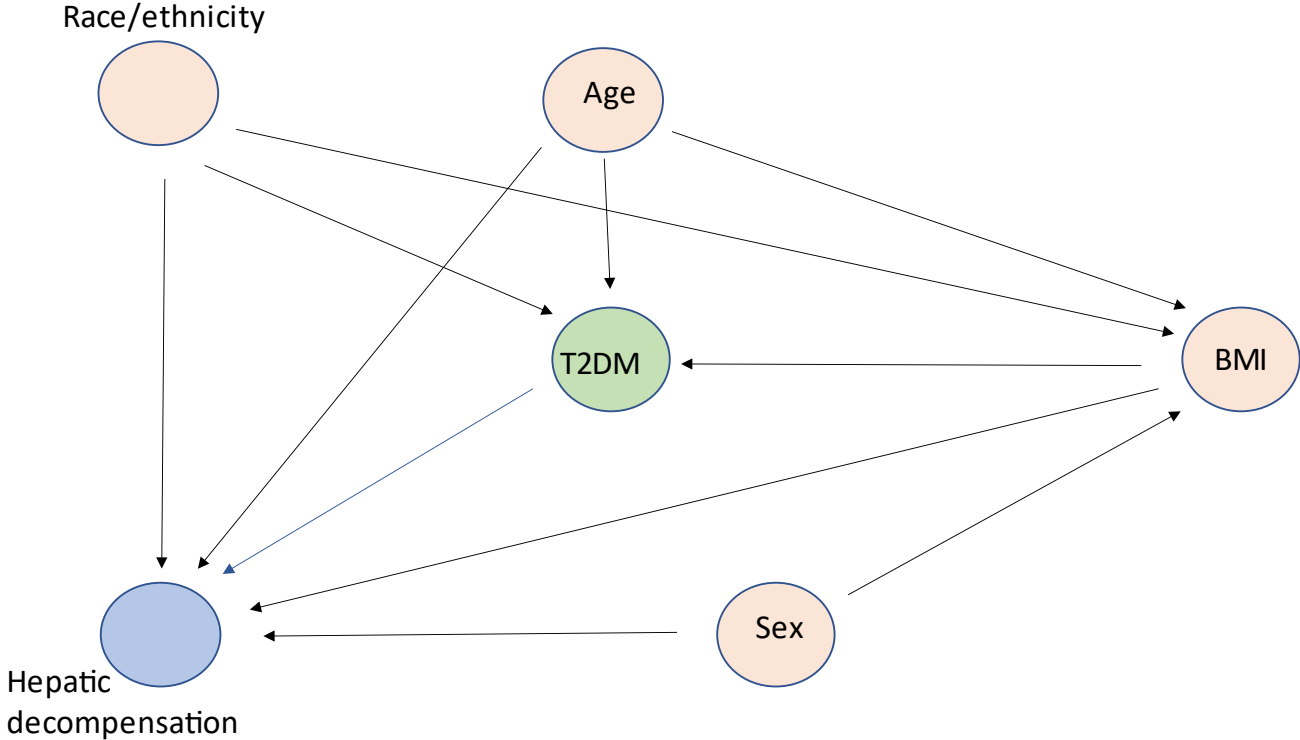

**Supplemental Figure 2.** Study selection

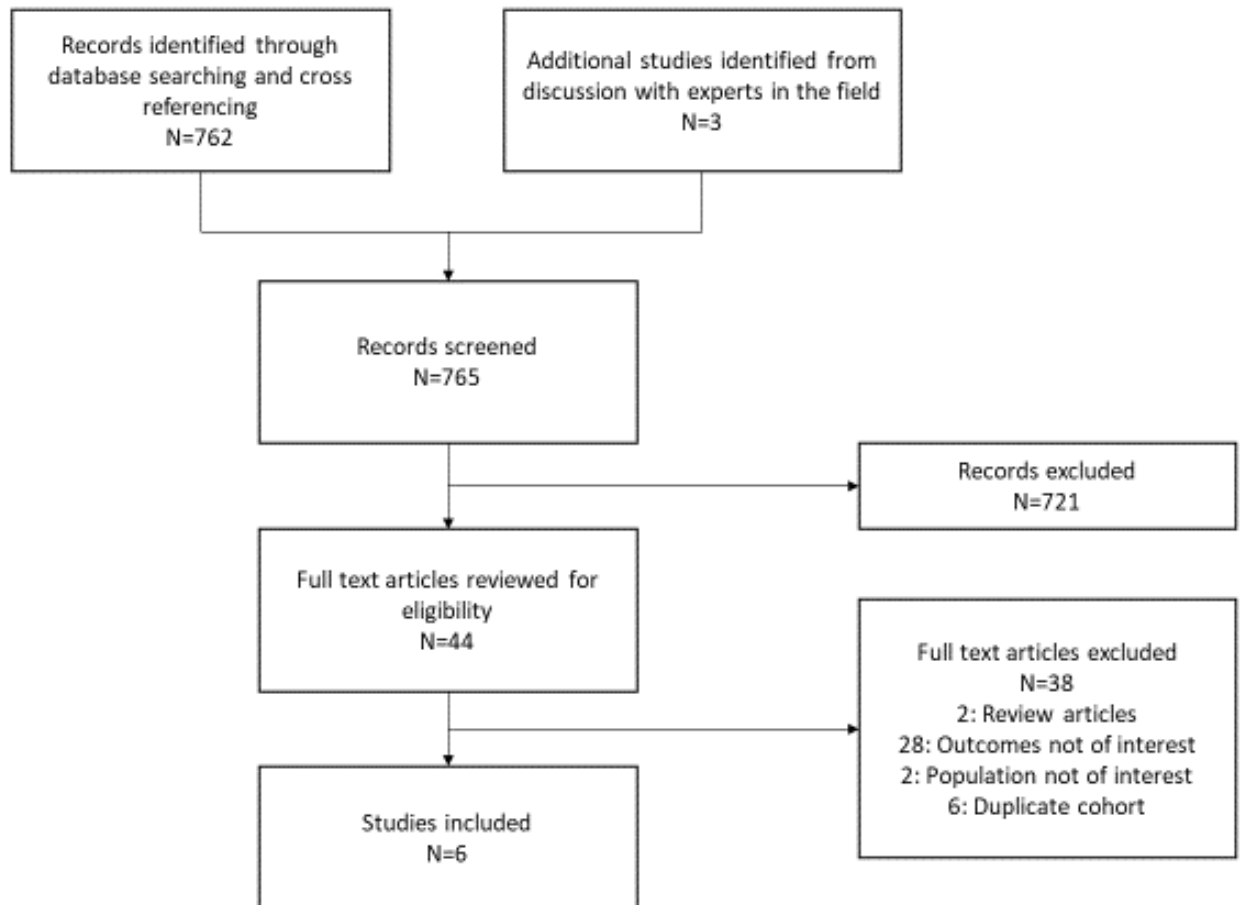

Supplement: NIHMS1959537-supplement-supp.pdf [file NIHMS1959537-supplement-supp.pdf]
